# Supplementary material
Source: PubMed Central journal article supplement (PMC7613120)
Supplement: EMS150700-supplement-Supplementary_Material.pdf [file EMS150700-supplement-Supplementary_Material.pdf]

## **The effects of an IL-21 receptor antagonist on the alloimmune response in a humanized mouse skin transplant model**

Kitty de Leur, MSc<sup>1,2</sup>, Franka Luk, MSc<sup>1</sup>, Thierry P.P. van den Bosch, PhD<sup>3</sup>, Marjolein Dieterich, BSc<sup>1</sup>, Luc J.W. van der Laan, PhD<sup>2</sup>, Rudi W. Hendriks, PhD<sup>4</sup>, Marian C. Clahsen - van Groningen, MD, PhD<sup>3</sup>, Fadi Issa, MD, PhD<sup>5</sup>, Carla C. Baan, PhD<sup>1</sup>,  
Martin J. Hoogduijn, PhD<sup>1</sup>

<sup>1</sup>The Rotterdam Transplant Group, Department of Internal Medicine, <sup>2</sup>Department of Surgery, <sup>3</sup>Department of Pathology, <sup>4</sup>Department of Pulmonary Medicine, Erasmus MC, University Medical Center Rotterdam, The Netherlands, <sup>5</sup>Nuffield Department of Surgical Sciences, Transplantation Research Immunology Group, University of Oxford, United Kingdom

# **Supplemental Figures**

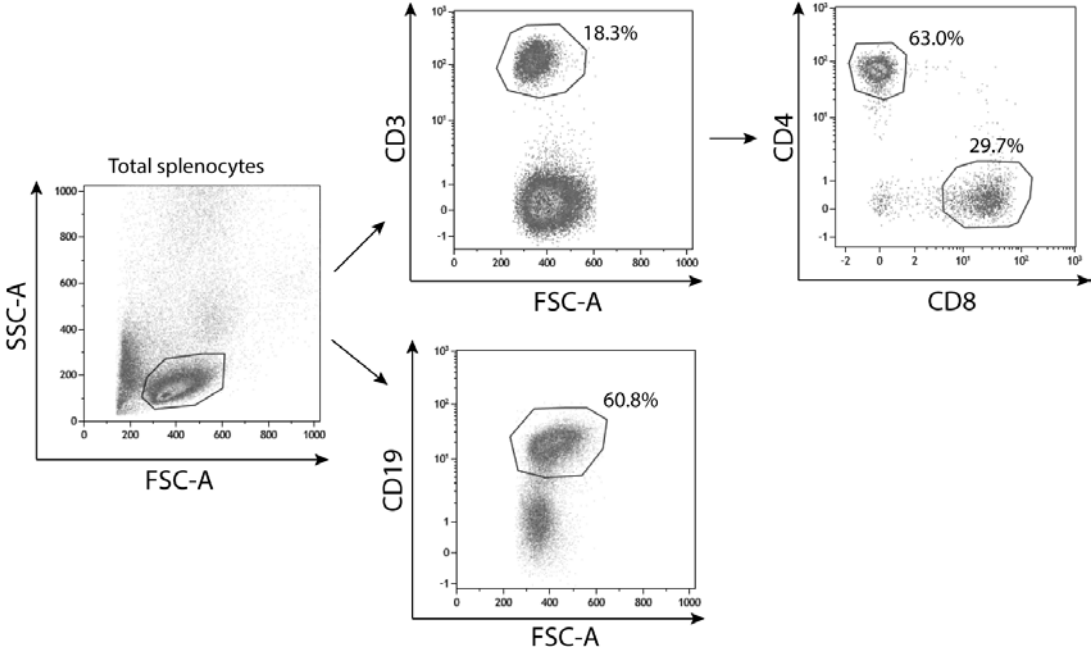

**Figure S1.**

**Composition of splenocyte subsets used for adoptive cellular transfer**

Dot plots depicting the proportions of CD3<sup>+</sup> T cells, CD4<sup>+</sup> and CD8<sup>+</sup> T cells within the total CD3<sup>+</sup> T cell population, and CD19<sup>+</sup> B cells. Proportions of the different lymphocyte populations are depicted within the dot plots.
